# Supplementary material
Source: Springer Nature journal article supplement (https://www.springermedizin.de/resource/supplementary/12957_2011_809_MOESM3_ESM.pdf/9565920)

Se:4  
Im:137

[A]

Study Date:14/12/2010  
Study Time:11:33:27 AM  
MRN:

[R]

[L]

[P]

C4  
W393

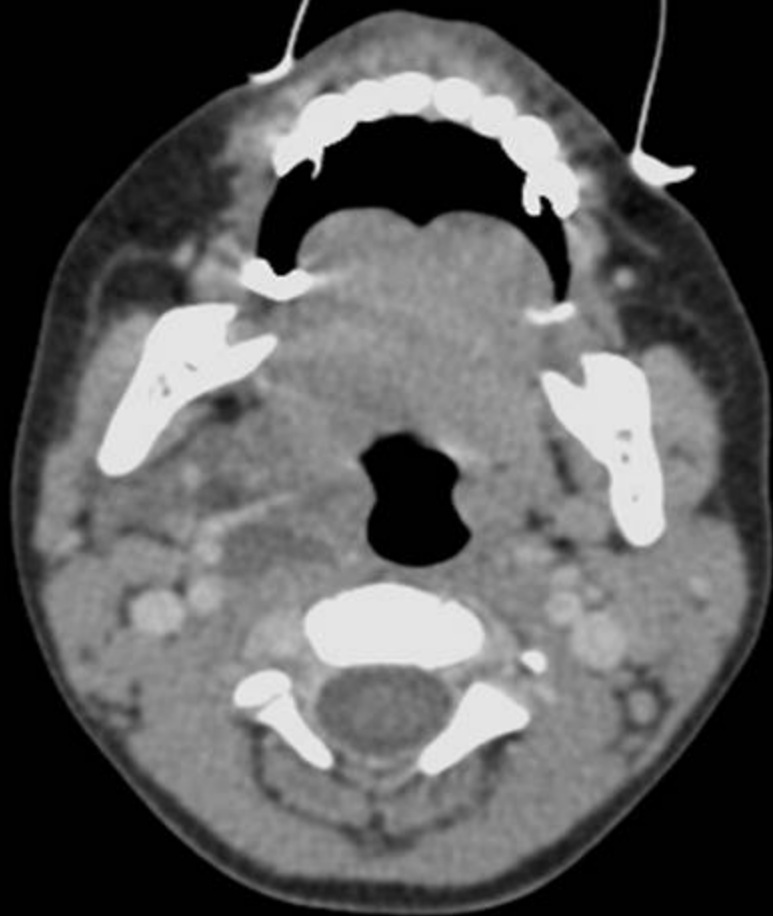

Supplement: MOESM3 [file 9565920]
